# Supplementary material for: An in-plane WSe2 p–n homojunction two-dimensional diode by laser-induced doping
Source: Royal Society of Chemistry journal article supplement (doi:10.1039/d0tc01790f), 2020-01-01
Supplement: d0tc01790f1.pdf [file d0tc01790f1.pdf]

## Supporting information

### **In-plane WSe<sub>2</sub> p-n homojunction two-dimensional diode by laser-induced doping**

Sujeong Yang<sup>1\*</sup>, Geonyeop Lee<sup>1\*</sup>, Janghyuk Kim<sup>1</sup>, Seounghoon Yang<sup>2</sup>, Chul-Ho Lee<sup>2\*\*</sup>, and  
Jihyun Kim<sup>1\*\*</sup>

<sup>1</sup> Department of Chemical and Biological Engineering, Korea University, Seoul 02841, Korea

<sup>2</sup> KU-KIST Graduate School of Converging Science and Technology, Korea University, Seoul  
02841, Korea

\*The authors contributed equally to this work.

\*\*Corresponding authors: Chul-Ho Lee ([chlee80@korea.ac.kr](mailto:chlee80@korea.ac.kr)) and Jihyun Kim  
([hyunhyun7@korea.ac.kr](mailto:hyunhyun7@korea.ac.kr))

Figure S1

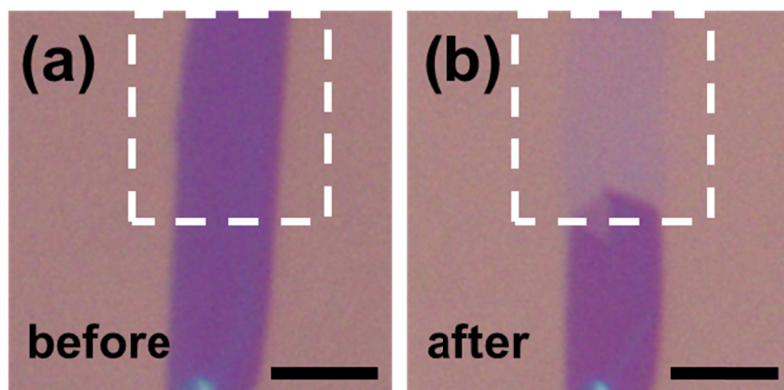

Optical microscope images of the WSe<sub>2</sub> flake (a) before and (b) after laser treatment. The white dashed square defines the laser-treated region, which became transparent owing to the formation of WO<sub>x</sub>. The scale bar is 5  $\mu\text{m}$ .

Figure S2

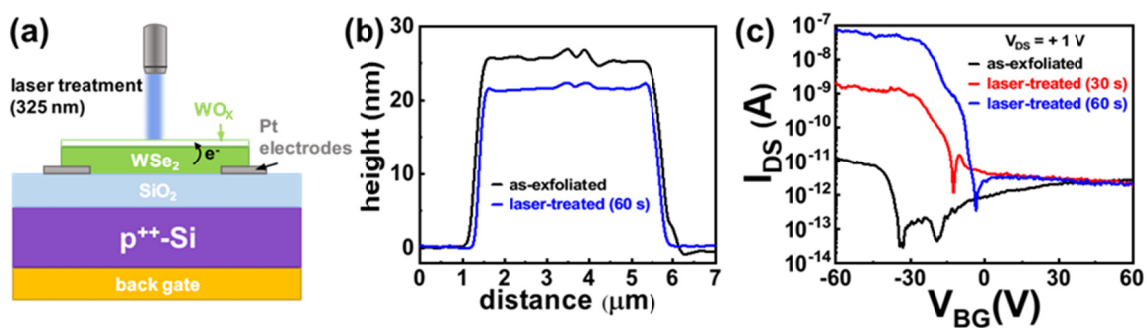

(a) Schematic of laser treatment of a WSe<sub>2</sub> FET (b) AFM height profiles of as-exfoliated and laser-treated (60 s) WSe<sub>2</sub> (c) Transfer curves of WSe<sub>2</sub> FET at varying laser exposure time

Figure S3

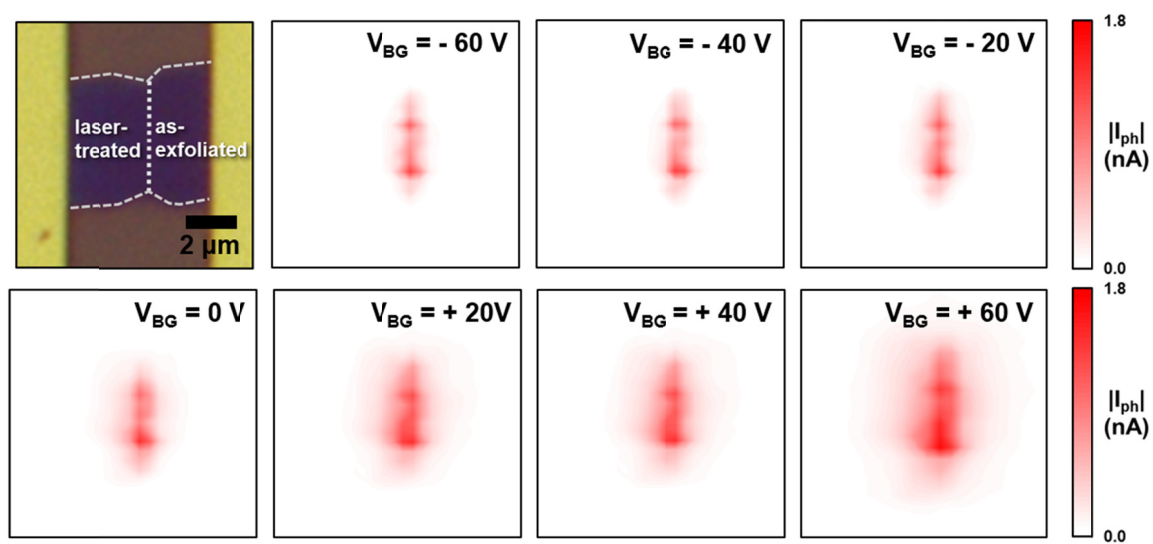

Optical microscope image of partially laser-treated  $\text{WSe}_2$  with corresponding photocurrent mapping images at different  $V_{\text{BG}}$  ( $V_{\text{DS}} = 0$ ).
